# Supplementary material for: Rational attenuation of RNA viruses with zinc finger antiviral protein
Source: PubMed Central journal article supplement (PMC9519448; doi:10.1038/s41564-022-01223-8), 2022-09-08

Uncropped western blots in Extended Figure 1c

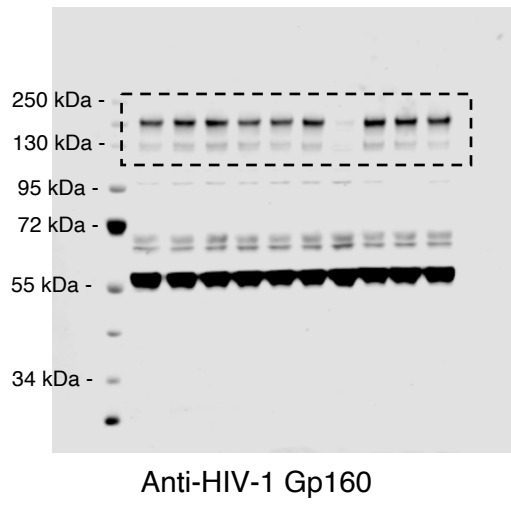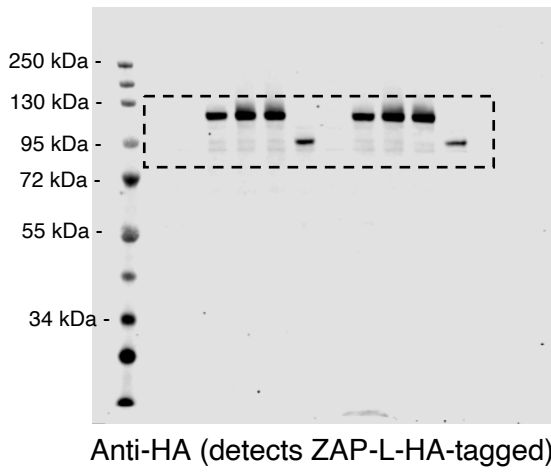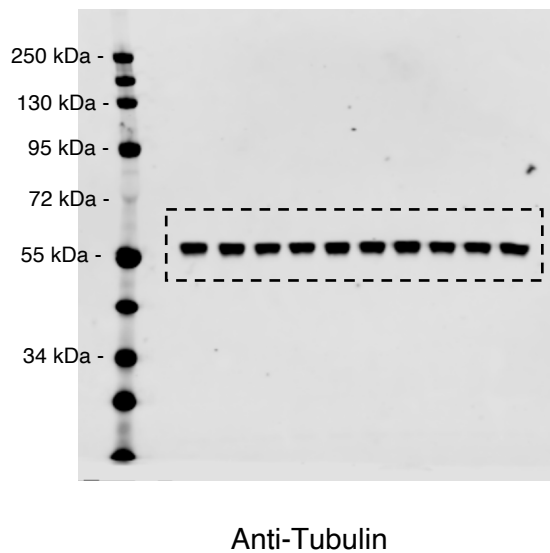

Supplement: 41564_2022_1223_MOESM8_ESM.pdf [file 41564_2022_1223_MOESM8_ESM.pdf]
